# Supplementary material for: Ethanol extract of Pinus koraiensis leaves containing lambertianic acid exerts anti-obesity and hypolipidemic effects by activating adenosine monophosphate-activated protein kinase (AMPK)
Source: Springer Nature journal article supplement (doi:10.1186/s12906-016-1031-2), 2016-02-04
Supplement: MOESM2 [file 9756030]

**Supplementary table 1. Composition of fat in HFD**

| <b>Ingredient</b>                        |                  |
|------------------------------------------|------------------|
| <b>Cholesterol</b>                       | <b>2,027 ppm</b> |
| <b>Linoleic Acid</b>                     | <b>1.07%</b>     |
| <b>Linolenic Acid</b>                    | <b>0.10%</b>     |
| <b>Arachidonic Acid</b>                  | <b>0.03%</b>     |
| <b>Omega-3 Fatty Acids</b>               | <b>0.21%</b>     |
| <b>Total Saturated Fatty Acids</b>       | <b>12.09%</b>    |
| <b>Total Monounsaturated Fatty Acids</b> | <b>4.61%</b>     |
| <b>Polyunsaturated Fatty Acids</b>       | <b>0.58%</b>     |
| <b>total</b>                             | <b>20.0%</b>     |
